# Supplementary material
Source: PubMed Central journal article supplement (PMC6777592)
Supplement: CJN.03140319SupplementaryData.pdf [file CJN.03140319SupplementaryData.pdf]

*Supplemental material is neither peer-reviewed nor thoroughly edited by CJASN. The authors alone are responsible for the accuracy and presentation of the material.*

## **Supplemental Material Table of Contents**

Supplemental Table 1: Unadjusted associations with preemptive deceased donor kidney transplantation, before and after KAS

Supplemental Table 2: Sensitivity analysis incorporating additional socioeconomic variables: Unadjusted associations with preemptive transplantation - overall, pre-KAS (2000-2013), and post-KAS (2015-2018)

Supplemental Table 3: Sensitivity analysis incorporating additional socioeconomic variables: Adjusted associations with preemptive transplantation pre-KAS (2000-2013) and post-KAS (2015-2018)

Supplemental Table 4: Unadjusted and adjusted associations with preemptive transplantation among living donor kidney transplant recipients, before and after KAS

Supplemental Figure 1: Median waiting time between addition to the waitlist or starting dialysis and receiving a deceased donor kidney transplant

Supplemental Figure 2: Proportion of living and deceased donor kidney transplants occurring preemptively over time, by donor type

| Supplemental Table 1: Unadjusted associations with preemptive deceased donor transplantation before and after KAS |                     |                      |         |
|-------------------------------------------------------------------------------------------------------------------|---------------------|----------------------|---------|
| Characteristic                                                                                                    | pre-KAS (2000-2013) | post-KAS (2015-2018) | p-value |
|                                                                                                                   | OR (95% CI)         | OR (95% CI)          |         |
| <b>Race/Ethnicity</b>                                                                                             |                     |                      |         |
| White                                                                                                             | reference group     | reference group      |         |
| Black                                                                                                             | 0.31 (0.29, 0.33)   | 0.24 (0.22, 0.26)    | < 0.001 |
| Hispanic                                                                                                          | 0.30 (0.27, 0.32)   | 0.26 (0.24, 0.30)    | 0.12    |
| Other                                                                                                             | 0.38 (0.35, 0.42)   | 0.38 (0.33, 0.44)    | 0.94    |
| <b>Age at Transplant</b>                                                                                          |                     |                      |         |
| Years+                                                                                                            | 1.17 (1.15, 1.19)   | 1.26 (1.23, 1.30)    | < 0.001 |
| <b>Sex</b>                                                                                                        |                     |                      |         |
| Male                                                                                                              | reference group     | reference group      |         |
| Female                                                                                                            | 1.37 (1.32, 1.43)   | 1.43 (1.33, 1.53)    | 0.36    |
| <b>Education Level</b>                                                                                            |                     |                      |         |
| High School or Less                                                                                               | reference group     | reference group      |         |
| Post-High School Education                                                                                        | 1.62 (1.55, 1.70)   | 1.70 (1.58, 1.82)    | 0.30    |
| Unknown                                                                                                           | 1.50 (1.41, 1.60)   | 2.66 (2.25, 3.13)    | < 0.001 |
| <b>Primary Payer</b>                                                                                              |                     |                      |         |
| Private                                                                                                           | reference group     | reference group      |         |
| Medicare                                                                                                          | 0.22 (0.21, 0.23)   | 0.17 (0.16, 0.18)    | <0.001  |
| Medicaid                                                                                                          | 0.45 (0.41, 0.49)   | 0.37 (0.32, 0.43)    | 0.03    |
| Other/Unknown                                                                                                     | 0.70 (0.62, 0.80)   | 0.59 (0.52, 0.68)    | 0.08    |
| <b>ESKD Etiology</b>                                                                                              |                     |                      |         |
| Glomerulonephritis                                                                                                | reference group     | reference group      |         |
| Diabetes                                                                                                          | 0.68 (0.62, 0.75)   | 0.69 (0.56, 0.85)    | 0.91    |
| Hypertension                                                                                                      | 0.67 (0.60, 0.74)   | 0.59 (0.47, 0.73)    | 0.29    |
| PCKD                                                                                                              | 2.01 (1.82, 2.22)   | 2.19 (1.76, 2.72)    | 0.47    |
| Other/Unknown                                                                                                     | 1.35 (1.24, 1.48)   | 1.75 (1.43, 2.14)    | 0.02    |
| <b>EPTS Score at Transplant</b>                                                                                   |                     |                      |         |
| > 20% or Unknown                                                                                                  | reference group     | reference group      |         |
| ≤ 20% (Top 20)                                                                                                    | 1.51 (1.45, 1.58)   | 1.44 (1.33, 1.55)    | 0.22    |
| <b>KDPI Score</b>                                                                                                 |                     |                      |         |
| ≤ 85%/Unknown                                                                                                     | reference group     | reference group      |         |
| > 85% (High KDPI)                                                                                                 | 0.79 (0.73, 0.84)   | 0.68 (0.60, 0.79)    | 0.07    |
| <b>HLA Mismatch</b>                                                                                               |                     |                      |         |
| Non-Zero MM/Unknown                                                                                               | reference group     | reference group      |         |
| Zero Mismatch                                                                                                     | 1.86 (1.76, 1.97)   | 2.44 (2.12, 2.79)    | <0.001  |
| <b>PRA Sensitization</b>                                                                                          |                     |                      |         |
| PRA <80%                                                                                                          | reference group     | reference group      |         |
| PRA 80-97%                                                                                                        | 0.95 (0.87, 1.05)   | 1.29 (0.73, 2.28)    | 0.30    |
| PRA 98-100%                                                                                                       | 0.77 (0.67, 0.90)   | 0.64 (0.30, 1.39)    | 0.65    |
| Unknown                                                                                                           | 3.06 (2.76, 3.40)   | 1.63 (1.39, 1.91)    | <0.001  |
| <b>ABO Blood Type</b>                                                                                             |                     |                      |         |
| O                                                                                                                 | reference group     | reference group      |         |
| A                                                                                                                 | 1.43 (1.37, 1.50)   | 1.52 (1.40, 1.64)    | 0.20    |
| B                                                                                                                 | 1.00 (0.93, 1.07)   | 1.13 (1.02, 1.27)    | 0.06    |
| AB                                                                                                                | 1.79 (1.65, 1.95)   | 1.93 (1.68, 2.22)    | 0.36    |
| <b>Diabetes</b>                                                                                                   |                     |                      |         |
| No/Unknown                                                                                                        | reference group     | reference group      |         |
| Yes                                                                                                               | 0.69 (0.66, 0.73)   | 0.71 (0.66, 0.77)    | 0.53    |
| <b>Transplant Year</b>                                                                                            |                     |                      |         |
| Additional Year                                                                                                   | 1.02 (1.01, 1.03)   | 1.12 (1.08, 1.16)    | <0.001  |

p-value is for the interaction term between policy era and the characteristic

+ OR is for a 10-year increase in age

KAS, Kidney Allocation System; OR, odds ratio; CI, confidence interval; HS, high school; ESKD, End Stage Kidney Disease; PCKD, Polycystic Kidney Disease; EPTS, Estimated Post-Transplant Survival; KDPI, Kidney Donor Profile Index; HLA, Human Leukocyte Antigens; MM, mismatch; PRA, Panel Reactive Antibody

Supplemental material is neither peer-reviewed nor thoroughly edited by CJASN. The authors alone are responsible for the accuracy and presentation of the material.

Supplemental Table 2: Sensitivity analysis incorporating additional socioeconomic variables: Unadjusted associations with preemptive transplantation - overall\*, pre-KAS (2000-2013), and post-KAS (2015-2018)

|                           | Number of DDK Transplants |         |          | n (%) preemptive |                |                | Unadjusted Odds Ratio (95% CI) |                     |                     | interaction term p-value |
|---------------------------|---------------------------|---------|----------|------------------|----------------|----------------|--------------------------------|---------------------|---------------------|--------------------------|
|                           | overall                   | pre-KAS | post-KAS | overall          | pre-KAS        | post-KAS       | overall                        | pre-KAS             | post-KAS            |                          |
| <b>Medicaid Recipient</b> |                           |         |          |                  |                |                |                                |                     |                     |                          |
| No                        | 112,780                   | 76,742  | 29,247   | 12,720<br>(11%)  | 8,695<br>(11%) | 3,181<br>(11%) | reference group                |                     |                     |                          |
| Yes                       | 44,293                    | 34,411  | 7337     | 1,900<br>(4%)    | 1,350<br>(4%)  | 422<br>(6%)    | 0.35<br>(0.34-0.37)            | 0.32<br>(0.30-0.34) | 0.50<br>(0.45-0.56) | < 0.001                  |
| <b>Working Status</b>     |                           |         |          |                  |                |                |                                |                     |                     |                          |
| Working for Income        | 31,902                    | 18,829  | 10,296   | 4,806<br>(15%)   | 3,003<br>(16%) | 1,422<br>(14%) | reference group                |                     |                     |                          |
| Not Working - Disability  | 30,734                    | 19,816  | 7775     | 1,458<br>(5%)    | 1,104<br>(6%)  | 199<br>(3%)    | 0.28<br>(0.26-0.30)            | 0.31<br>(0.29-0.33) | 0.16<br>(0.14-0.19) | < 0.001                  |
| Not Working - Other       | 42,706                    | 22,434  | 17,276   | 4,478<br>(10%)   | 2,267<br>(10%) | 1,816<br>(11%) | 0.66<br>(0.63-0.69)            | 0.59<br>(0.56-0.63) | 0.73<br>(0.68-0.79) | < 0.001                  |
| Unknown/Missing           | 51,731                    | 50,074  | 1237     | 3,878<br>(7%)    | 3,671<br>(7%)  | 166<br>(13%)   | 0.46<br>(0.44-0.48)            | 0.42<br>(0.40-0.44) | 0.97<br>(0.81-1.15) | < 0.001                  |

The percentages reported in the table are row percentages - the percent of all DDK transplants in that era that were preemptive.

Abbreviations: DDK, deceased donor kidney; KAS, Kidney Allocation System

\* overall includes 2014, pre-KAS and post-KAS exclude 2014

Supplemental Table 3: Sensitivity analysis incorporating additional socioeconomic variables: Adjusted associations with preemptive transplantation pre-KAS (2000-2013) and post-KAS (2015-2018)

| Characteristic                  | adjusted model* |              |                 |              | p-value |
|---------------------------------|-----------------|--------------|-----------------|--------------|---------|
|                                 | pre-KAS         |              | post-KAS        |              |         |
|                                 | OR              | 95% CI       | OR              | 95% CI       |         |
| <b>Medicaid Recipient</b>       |                 |              |                 |              |         |
| No                              | reference group |              | reference group |              |         |
| Yes                             | 0.66            | (0.61, 0.71) | 0.92            | (0.77, 1.09) | 0.86    |
| <b>Working Status</b>           |                 |              |                 |              |         |
| Working for Income              | reference group |              | reference group |              |         |
| Not Working - Disability        | 0.62            | (0.57, 0.67) | 0.40            | (0.34, 0.47) | < 0.001 |
| Not Working - Other             | 0.76            | (0.72, 0.82) | 0.97            | (0.89, 1.06) | < 0.001 |
| Unknown/Missing                 | 0.56            | (0.52, 0.61) | 1.37            | (1.10, 1.71) | < 0.001 |
| <b>Race/Ethnicity</b>           |                 |              |                 |              |         |
| White                           | reference group |              | reference group |              |         |
| Black                           | 0.50            | (0.47, 0.53) | 0.42            | (0.38, 0.47) | < 0.001 |
| Hispanic                        | 0.47            | (0.43, 0.51) | 0.41            | (0.37, 0.47) | 0.01    |
| Other                           | 0.44            | (0.40, 0.49) | 0.45            | (0.39, 0.52) | 0.94    |
| <b>Age at Transplant</b>        |                 |              |                 |              |         |
| 10-year increase in age         | 1.64            | (1.60, 1.69) | 2.03            | (1.93, 2.14) | < 0.001 |
| <b>Sex</b>                      |                 |              |                 |              |         |
| Male                            | reference group |              | reference group |              |         |
| Female                          | 1.44            | (1.38, 1.51) | 1.37            | (1.27, 1.48) | 0.42    |
| <b>Education Level</b>          |                 |              |                 |              |         |
| High School or Less             | reference group |              | reference group |              |         |
| Post-High School Education      | 1.12            | (1.07, 1.18) | 1.11            | (1.02, 1.20) | 0.47    |
| Unknown                         | 1.47            | (1.37, 1.57) | 1.40            | (1.14, 1.73) | < 0.001 |
| <b>Primary Payer</b>            |                 |              |                 |              |         |
| Private                         | reference group |              | reference group |              |         |
| Medicare                        | 0.31            | (0.29, 0.33) | 0.22            | (0.20, 0.23) | < 0.001 |
| Medicaid                        | 1.12            | (0.99, 1.27) | 0.79            | (0.63, 0.98) | 0.19    |
| Other/Unknown                   | 0.88            | (0.76, 1.00) | 0.65            | (0.56, 0.76) | 0.07    |
| <b>ESKD Etiology</b>            |                 |              |                 |              |         |
| Glomerulonephritis              | reference group |              | reference group |              |         |
| Diabetes                        | 0.63            | (0.56, 0.72) | 0.54            | (0.42, 0.69) | 0.97    |
| Hypertension                    | 0.84            | (0.75, 0.93) | 0.75            | (0.59, 0.94) | 0.35    |
| PCKD                            | 1.27            | (1.14, 1.41) | 1.33            | (1.05, 1.68) | 0.63    |
| Other/Unknown                   | 1.24            | (1.12, 1.36) | 1.55            | (1.25, 1.92) | 0.07    |
| <b>EPTS Score at Transplant</b> |                 |              |                 |              |         |
| > 20% or Unknown                | reference group |              | reference group |              |         |
| ≤ 20% (Top 20)                  | 3.58            | (3.32, 3.85) | 4.39            | (3.81, 5.05) | 0.005   |
| <b>KDPI Score</b>               |                 |              |                 |              |         |
| ≤ 85%/Unknown                   | reference group |              | reference group |              |         |
| > 85% (High KDPI)               | 0.81            | (0.75, 0.87) | 0.66            | (0.57, 0.77) | 0.22    |
| <b>HLA Mismatch</b>             |                 |              |                 |              |         |
| Non-Zero MM/Unknown             | reference group |              | reference group |              |         |
| Zero Mismatch                   | 1.44            | (1.35, 1.53) | 1.53            | (1.31, 1.78) | 0.43    |
| <b>PRA Sensitization</b>        |                 |              |                 |              |         |
| PRA <80%                        | reference group |              | reference group |              |         |
| PRA 80-97%                      | 0.85            | (0.77, 0.94) | 1.06            | (0.56, 2.01) | 0.56    |
| PRA 98-100%                     | 0.75            | (0.64, 0.87) | 0.51            | (0.23, 1.16) | 0.39    |
| Unknown                         | 2.22            | (1.98, 2.49) | 1.17            | (0.98, 1.39) | < 0.001 |
| <b>ABO Blood Type</b>           |                 |              |                 |              |         |
| O                               | reference group |              | reference group |              |         |
| A                               | 1.20            | (1.14, 1.26) | 1.16            | (1.07, 1.27) | 0.91    |
| B                               | 1.11            | (1.03, 1.20) | 1.20            | (1.06, 1.35) | 0.35    |
| AB                              | 1.60            | (1.46, 1.74) | 1.48            | (1.27, 1.73) | 0.52    |
| <b>Diabetes</b>                 |                 |              |                 |              |         |
| No/Unknown                      | reference group |              | reference group |              |         |
| Yes                             | 1.43            | (1.32, 1.56) | 1.65            | (1.45, 1.89) | 0.78    |
| <b>Year of Transplant</b>       |                 |              |                 |              |         |
| Additional Year                 | 1.00            | (1.00, 1.01) | 1.01            | (0.97, 1.05) | 0.57    |

\* adjusted model includes all predictors in this table

p-value is for the interaction term between policy era and the characteristic

KAS, Kidney Allocation System; OR, odds ratio; CI, confidence interval; HS, high school; ESKD, End Stage Kidney Disease; PCKD, Polycystic Kidney Disease; KDPI, Kidney Donor Profile Index; HLA, Human Leukocyte Antigens; MM, mismatch; PRA, Panel Reactive Antibody

*Supplemental material is neither peer-reviewed nor thoroughly edited by CJASN. The authors alone are responsible for the accuracy and presentation of the material.*

Supplemental material is neither peer-reviewed nor thoroughly edited by CJASN. The authors alone are responsible for the accuracy and presentation of the material.

| Supplemental Table 4: Unadjusted and adjusted associations with preemptive transplantation among living donor kidney transplant recipients, before and after KAS |                        |                         |                   |                        |                         |                   |
|------------------------------------------------------------------------------------------------------------------------------------------------------------------|------------------------|-------------------------|-------------------|------------------------|-------------------------|-------------------|
| Characteristic                                                                                                                                                   | unadjusted             |                         |                   | adjusted*              |                         |                   |
|                                                                                                                                                                  | pre-KAS<br>OR (95% CI) | post-KAS<br>OR (95% CI) | p-value           | pre-KAS<br>OR (95% CI) | post-KAS<br>OR (95% CI) | p-value           |
| <b>Race/Ethnicity</b>                                                                                                                                            |                        |                         |                   |                        |                         |                   |
| White                                                                                                                                                            | reference group        | reference group         |                   | reference group        | reference group         |                   |
| Black                                                                                                                                                            | 0.37 (0.36, 0.40)      | 0.37 (0.33, 0.41)       | 0.75              | 0.49 (0.46, 0.52)      | 0.48 (0.43, 0.54)       | 0.44              |
| Hispanic                                                                                                                                                         | 0.38 (0.36, 0.40)      | 0.42 (0.38, 0.46)       | 0.076             | 0.50 (0.47, 0.53)      | 0.59 (0.53, 0.66)       | 0.34              |
| Other                                                                                                                                                            | 0.53 (0.49, 0.57)      | 0.57 (0.50, 0.64)       | 0.35              | 0.56 (0.52, 0.61)      | 0.63 (0.55, 0.72)       | 0.49              |
| <b>Age at Transplant</b>                                                                                                                                         |                        |                         |                   |                        |                         |                   |
| Years+                                                                                                                                                           | 1.08 (1.06, 1.09)      | 1.12 (1.09, 1.14)       | <b>0.002</b>      | 1.14 (1.12, 1.15)      | 1.28 (1.24, 1.32)       | <b>&lt; 0.001</b> |
| <b>Sex</b>                                                                                                                                                       |                        |                         |                   |                        |                         |                   |
| Male                                                                                                                                                             | reference group        | reference group         |                   | reference group        | reference group         |                   |
| Female                                                                                                                                                           | 1.12 (1.09, 1.16)      | 1.29 (1.21, 1.38)       | <b>&lt; 0.001</b> | 1.20 (1.15, 1.24)      | 1.31 (1.22, 1.40)       | <b>0.016</b>      |
| <b>Education Level</b>                                                                                                                                           |                        |                         |                   |                        |                         |                   |
| High School or Less                                                                                                                                              | reference group        | reference group         |                   | reference group        | reference group         |                   |
| Post-High School Education                                                                                                                                       | 1.68 (1.62, 1.74)      | 1.73 (1.61, 1.86)       | 0.44              | 1.28 (1.23, 1.33)      | 1.40 (1.30, 1.52)       | 0.12              |
| Unknown                                                                                                                                                          | 1.32 (1.25, 1.39)      | 1.61 (1.30, 1.99)       | 0.072             | 1.27 (1.20, 1.34)      | 1.43 (1.14, 1.80)       | 0.11              |
| <b>Primary Payer</b>                                                                                                                                             |                        |                         |                   |                        |                         |                   |
| Private                                                                                                                                                          | reference group        | reference group         |                   | reference group        | reference group         |                   |
| Medicare                                                                                                                                                         | 0.26 (0.25, 0.27)      | 0.28 (0.26, 0.30)       | 0.14              | 0.28 (0.27, 0.29)      | 0.26 (0.24, 0.28)       | 0.54              |
| Medicaid                                                                                                                                                         | 0.48 (0.44, 0.52)      | 0.54 (0.46, 0.64)       | 0.20              | 0.75 (0.69, 0.83)      | 0.87 (0.74, 1.03)       | 0.41              |
| Other/Unknown                                                                                                                                                    | 0.81 (0.72, 0.91)      | 0.81 (0.71, 0.94)       | 0.98              | 0.90 (0.80, 1.01)      | 0.81 (0.69, 0.94)       | 0.64              |
| <b>ESKD Etiology</b>                                                                                                                                             |                        |                         |                   |                        |                         |                   |
| Glomerulonephritis                                                                                                                                               | reference group        | reference group         |                   | reference group        | reference group         |                   |
| Diabetes                                                                                                                                                         | 0.80 (0.74, 0.86)      | 0.73 (0.61, 0.87)       | 0.34              | 0.92 (0.82, 1.02)      | 0.91 (0.72, 1.16)       | 0.67              |
| Hypertension                                                                                                                                                     | 0.75 (0.69, 0.81)      | 0.87 (0.73, 1.04)       | 0.13              | 0.89 (0.82, 0.97)      | 0.99 (0.82, 1.20)       | 0.33              |
| PCKD                                                                                                                                                             | 2.60 (2.40, 2.81)      | 3.02 (2.53, 3.61)       | 0.13              | 1.83 (1.68, 1.98)      | 2.24 (1.85, 2.71)       | <b>0.049</b>      |
| Other/Unknown                                                                                                                                                    | 1.17 (1.09, 1.26)      | 1.20 (1.02, 1.42)       | 0.78              | 1.14 (1.06, 1.22)      | 1.20 (1.00, 1.43)       | 0.99              |
| <b>HLA Mismatch</b>                                                                                                                                              |                        |                         |                   |                        |                         |                   |
| Non-Zero MM/Unknown                                                                                                                                              | reference group        | reference group         |                   | reference group        | reference group         |                   |
| Zero Mismatch                                                                                                                                                    | 1.20 (1.13, 1.26)      | 1.21 (1.06, 1.38)       | 0.90              | 1.21 (1.14, 1.29)      | 1.20 (1.04, 1.39)       | 0.91              |
| <b>PRA Sensitization</b>                                                                                                                                         |                        |                         |                   |                        |                         |                   |
| PRA <80%                                                                                                                                                         | reference group        | reference group         |                   | reference group        | reference group         |                   |
| PRA 80-97%                                                                                                                                                       | 0.65 (0.58, 0.74)      | 0.49 (0.14, 1.74)       | 0.65              | 0.63 (0.55, 0.72)      | 0.64 (0.17, 2.47)       | 0.96              |
| PRA 98-100%                                                                                                                                                      | 0.45 (0.36, 0.55)      | 0.32 (0.04, 2.70)       | 0.77              | 0.48 (0.38, 0.60)      | 0.27 (0.03, 2.51)       | 0.58              |
| Unknown                                                                                                                                                          | 1.37 (1.26, 1.49)      | 1.13 (0.97, 1.32)       | <b>0.033</b>      | 1.17 (1.07, 1.28)      | 1.07 (0.90, 1.27)       | 0.12              |
| <b>ABO Blood Type</b>                                                                                                                                            |                        |                         |                   |                        |                         |                   |
| O                                                                                                                                                                | reference group        | reference group         |                   | reference group        | reference group         |                   |
| A                                                                                                                                                                | 1.21 (1.17, 1.25)      | 1.17 (1.09, 1.26)       | 0.40              | 1.09 (1.05, 1.13)      | 1.09 (1.01, 1.18)       | 0.81              |
| B                                                                                                                                                                | 0.96 (0.91, 1.01)      | 0.93 (0.85, 1.03)       | 0.70              | 1.02 (0.97, 1.08)      | 1.00 (0.89, 1.11)       | 0.68              |
| AB                                                                                                                                                               | 1.29 (1.18, 1.40)      | 1.15 (0.97, 1.35)       | 0.21              | 1.25 (1.14, 1.37)      | 1.10 (0.92, 1.31)       | 0.18              |
| <b>Diabetes</b>                                                                                                                                                  |                        |                         |                   |                        |                         |                   |
| No                                                                                                                                                               | reference group        | reference group         |                   | reference group        | reference group         |                   |
| Yes                                                                                                                                                              | 0.67 (0.65, 0.70)      | 0.57 (0.53, 0.61)       | <b>&lt; 0.001</b> | 0.84 (0.78, 0.91)      | 0.77 (0.66, 0.91)       | <b>0.039</b>      |
| <b>Year of Transplant</b>                                                                                                                                        |                        |                         |                   |                        |                         |                   |
| Additional Year                                                                                                                                                  | 1.03 (1.03, 1.04)      | 1.04 (1.01, 1.08)       | 0.50              | 1.04 (1.03, 1.04)      | 1.02 (0.98, 1.05)       | 0.24              |

The Living Donor cohort used for this analysis included 70,082 transplants (21,969 preemptive) occurring pre-KAS (2000-2013) and 16,446 transplants (6,042 preemptive) occurring post-KAS (2015-2018). Inclusion/exclusion criteria were the same as presented in Figure 1, except replacing Deceased Donor with Living Donor.

\* adjusted model includes all predictors in this table

+ OR is for a 10-year increase in age

p-value is for the interaction term between policy era and the characteristic

KAS, Kidney Allocation System; OR, odds ratio; CI, confidence interval; HS, high school; ESKD, End Stage Kidney Disease; PCKD, Polycystic Kidney Disease; KDPI, Kidney Donor Profile Index; HLA, Human Leukocyte Antigens; MM, mismatch; PRA, Panel Reactive Antibody

*Supplemental material is neither peer-reviewed nor thoroughly edited by CJASN. The authors alone are responsible for the accuracy and presentation of the material.*

Supplemental material is neither peer-reviewed nor thoroughly edited by CJASN. The authors alone are responsible for the accuracy and presentation of the material.

Supplemental Figure 1: Median waiting time between addition to the waitlist or starting dialysis and receiving a deceased donor kidney transplant

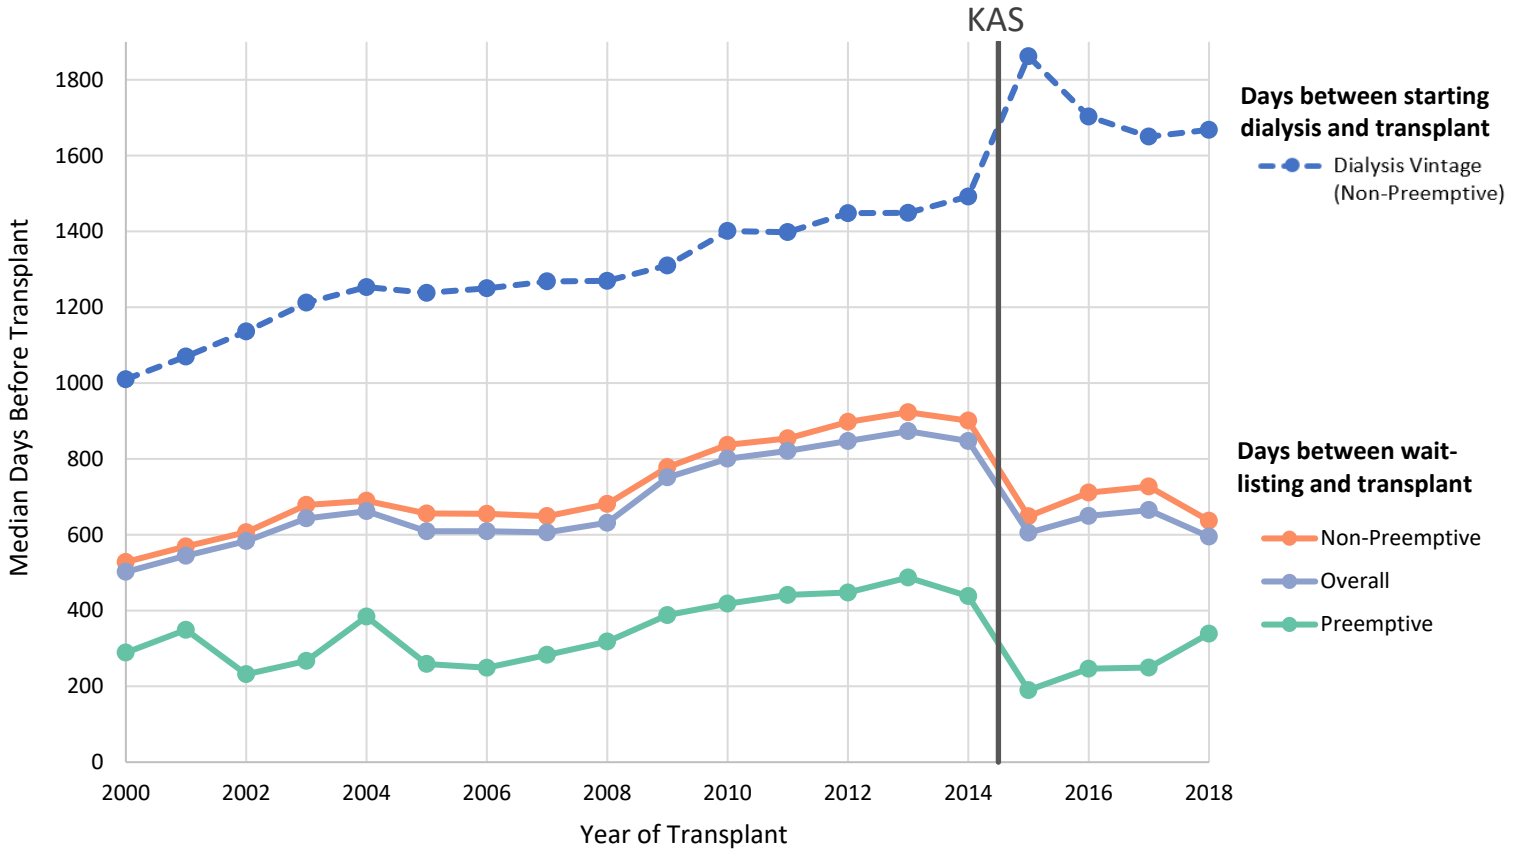



Supplemental material is neither peer-reviewed nor thoroughly edited by CJASN. The authors alone are responsible for the accuracy and presentation of the material.

Supplemental Figure 2: Proportion of living and deceased donor kidney transplants occurring preemptively over time, by donor type

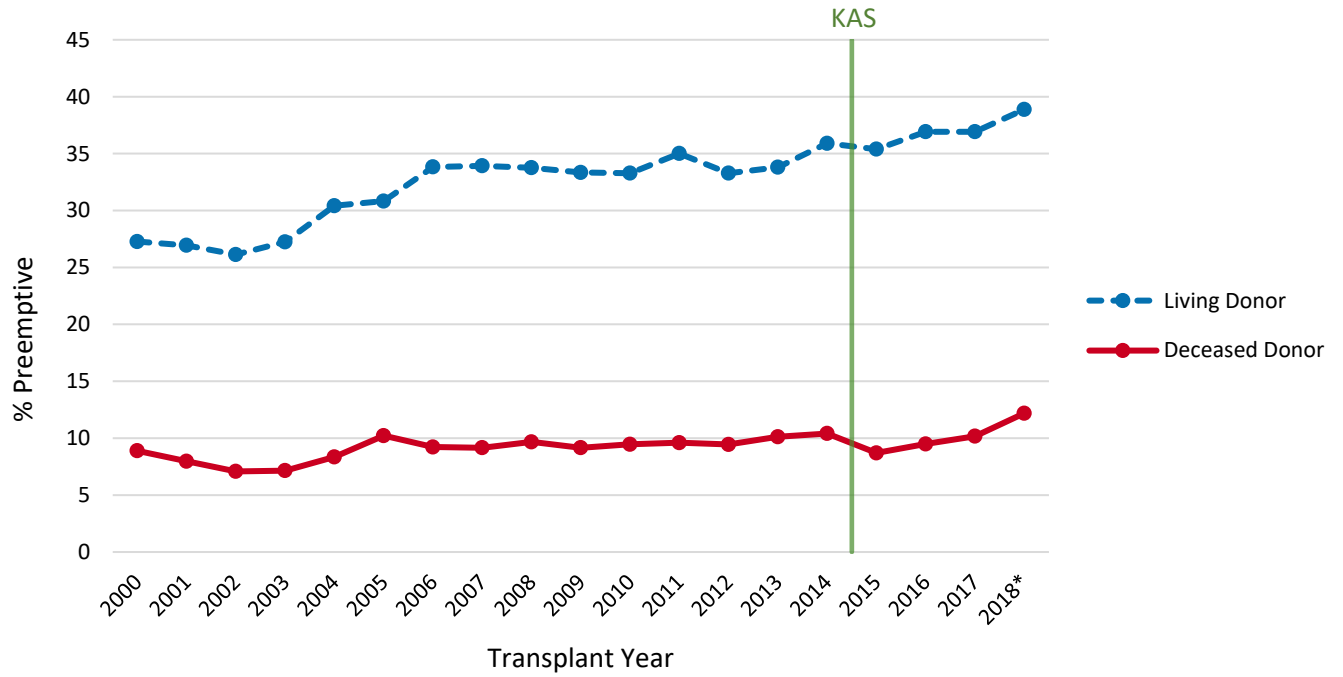

\*2018 data only available through 05/31/2018
